# Supplementary material for: Is Periodontitis Associated with Age-Related Cognitive Impairment? The Systematic Review, Confounders Assessment and Meta-Analysis of Clinical Studies
Source: MDPI journal article supplement (doi:10.3390/ijms232315320), 2022-12-05
Supplement: s1 [file s1]

**Table S1. Oral microorganisms potentially involved in aetiology of cognitive impairment**

| Year, authors                  | Method                                                                                                                 | Periodontal microorganisms                                                                                                                                     | Findings                                                                                                             |
|--------------------------------|------------------------------------------------------------------------------------------------------------------------|----------------------------------------------------------------------------------------------------------------------------------------------------------------|----------------------------------------------------------------------------------------------------------------------|
| 2002, Riviere et al. [119]     | Experimental, postmortem, brain tissue, PCR, immunochemistry                                                           | <i>Treponema</i>                                                                                                                                               | Detected                                                                                                             |
| 2009, Kammer [60]              | Observational, blood, TNF- $\alpha$ , IL-1 $\beta$ , IL-6 levels, IgG antibody                                         | <i>T. denticola</i> ,<br><i>P. gingivalis</i> ,<br><i>A. actinomycetemcom.</i>                                                                                 | Correlation between the detected level of antibodies and Alzheimer's disease diagnosis                               |
| 2012, Sparks et al. [165]      | Longitudinal, blood, antibodies level                                                                                  | <i>A. actinomycetemcom.</i> ,<br><i>P. gingivalis</i> ,<br><i>C. rectus</i> , <i>T. denticola</i> ,<br><i>Fusobacterium nucleatum</i> ,<br><i>T. forsythia</i> | Relationship between antibodies level and onset/progression of Alzheimer's disease                                   |
| 2013, Poole et al. [70]        | Experimental, postmortem, brain tissue, cell line SVGP12, bacterial lipopolisacharydes (LPS)                           | <i>T. denticola</i><br><i>T. forsythia</i><br><i>P. gingivalis</i> (P.g.)                                                                                      | Underpins the hypothesis of association between LPS produced by P.g. and Alzheimers' disease                         |
| 2014, Noble et al. [75]        | Case-cohort study, plazma level of IgG in persons with Alzheimer's disease                                             | <i>P. gingivalis</i> ,<br><i>T. forsythia</i><br><i>A. actinomycetemcom.</i> ,<br><i>T. denticola</i> ,<br><i>C. rectus</i> ,<br><i>E. nodatum</i>             | Plazma IgG level against periodontal bacteria is associated with risk for developing incident of Alzheimer's disease |
| 2016, Ide et al. [41]          | Cohort, observational study, plazma antibodies, inflammatory markers, DNA assay                                        | <i>P. gingivalis</i>                                                                                                                                           | Results indicate a relationship between periodontitis and cognitive impairment                                       |
| 2017, Wu et al. [133]          | Experimental, animals, (mice), MG6 microglia cell line, LPS                                                            | <i>P. gingivalis</i>                                                                                                                                           | Results support the infectious hypothesis of Alzheimer's disease                                                     |
| 2017, Liu et al. [166]         | Experimental, animals, (mice), MG6 microglia cell line, P.g. gingipain                                                 | <i>P. gingivalis</i>                                                                                                                                           | Results support the infectious hypothesis of Alzheimer's disease                                                     |
| 2017, Ishida et al. [167]      | Experimental, animals (mice), amyloid $\beta$ , IL-1 $\beta$ , TNF- $\alpha$                                           | <i>P. gingivalis</i>                                                                                                                                           | Periodontitis is a risk factor of Alzheimer's disease                                                                |
| 2019, Hayashi et al. [168]     | Experimental, animal (mice), LPS                                                                                       | <i>P. gingivalis</i>                                                                                                                                           | Exposure to LPS affects prognosis of Alzheimer's disease                                                             |
| 2019, Nie et al. [169]         | Experimental, animal (mice), IL-1 $\beta$ , amyloid $\beta$                                                            | <i>P. gingivalis</i>                                                                                                                                           | Potential role in novel therapeutic agents inhibiting P.g. and the onset of Alzheimer's disease                      |
| 2019, Diaz-Zuniga et al. [170] | Experimental, animal (rat, cell line), IL-1 $\beta$ , IL-6, TNF- $\alpha$ , amyloid $\beta$                            | <i>A. actinomycetemcom.</i>                                                                                                                                    | Probable association between <i>Aggregatibacter</i> periopathogen and Alzheimer's disease etiology                   |
| 2019, Dominy et al. [117]      | Prospective pilot study, animal (mice) and patient with Alzheimer's disease, P.g. gingipain, P.g. DNA, amyloid $\beta$ | <i>P. gingivalis</i>                                                                                                                                           | <i>P. gingivalis</i> and its exo-toxin gingipain play a role in pathogenesis of Alzheimer's disease                  |

**Table S2. Database search criteria**

---

1#

(periodontal\* OR periodontium OR periodontitis OR periodontal disease OR chronic periodontitis OR periodontal pocket OR probing depth OR pocket depth OR clinical attachment loss OR alveolar bone loss OR periodontal bone loss OR attachment loss OR tooth mobility OR alveolar resorption OR bone loss)

AND

2#

(cognitive\* OR cognition OR cognitive function OR memory OR memory loss OR cognitive impairment OR cognitive decline OR Alzheimer disease OR Alzheimer's\* OR dementia OR vascular dementia OR neurodegeneration OR neurodegenerative disease OR central nervous system OR brain OR neural OR neurological)

---

**Table S3. Worksheet of extracted details from eligible articles.**

|   | General information |                    |                   |                                                                                       | Methods                                            | Population      |           |          |                            |      |                                        |       |                                            | Exposure and Control |                                                                                                                   |                                                                               |                                                                         | Cognitive impairment (CI)                        |               |                                                                       |                                                                                                |                                                |    |
|---|---------------------|--------------------|-------------------|---------------------------------------------------------------------------------------|----------------------------------------------------|-----------------|-----------|----------|----------------------------|------|----------------------------------------|-------|--------------------------------------------|----------------------|-------------------------------------------------------------------------------------------------------------------|-------------------------------------------------------------------------------|-------------------------------------------------------------------------|--------------------------------------------------|---------------|-----------------------------------------------------------------------|------------------------------------------------------------------------------------------------|------------------------------------------------|----|
| N | Authors<br>Year     | Title<br>Reference | Country<br>Region | Source of<br>study<br>sample:<br>(community,<br>database,<br>hospital,<br>university) | Study deisign<br>Length of<br>follow-up<br>(years) | Sample size (N) |           |          | Age at baseline<br>(years) |      | Gender<br>N (%) or NA (if<br>excluded) |       | Controlled main<br>confounders<br>(Yes/No) |                      | Health status<br>at baseline                                                                                      | Case definition<br>selected for<br>periodontitis.<br>NA in case of<br>absence | Assessment of<br>periodontal<br>status                                  | Periodontal status<br>at baseline<br>N (%) or NA |               | Case<br>definition<br>selected for<br>CI.<br>NA in case of<br>absence | Assessment of<br>cognitive<br>status                                                           | Cognitive status<br>at baseline<br>N (%) or NA |    |
|   |                     |                    |                   |                                                                                       |                                                    | Baseline        | Drop-outs | Analyzed | Range<br>(min-max)         | Mean | Men                                    | Women | Age                                        | Gender               | 1. General -<br>both<br>systemically<br>healthy and<br>diseased.<br>2. Only<br>systemically<br>healthy<br>people. | Case definition<br>selected for<br>periodontitis.<br>NA in case of<br>absence | 1. Clinical.<br>2. Radiological<br>NA.<br>Periodontitis not<br>assessed | No<br>Periodontitis                              | Periodontitis | Case definition<br>selected for<br>CI.<br>NA in case of<br>absence    | 1. Cognitive<br>tests<br>2. Only<br>diagnosis<br>NA. Cognitive<br>status not fully<br>assessed | No CI                                          | CI |

**Table S4. Characteristics of main confounders and covariates in 17 reviewed studies.**

| Study                  | Age | Sex | Smoking<br>Alcohol | Comorbidities                                                                                                                                                   | Medications | BMI | Education | Income | Physical<br>activity | Oral<br>hygiene<br>Dental care | Other                     |
|------------------------|-----|-----|--------------------|-----------------------------------------------------------------------------------------------------------------------------------------------------------------|-------------|-----|-----------|--------|----------------------|--------------------------------|---------------------------|
| <b>Cohort studies</b>  |     |     |                    |                                                                                                                                                                 |             |     |           |        |                      |                                |                           |
| Lee, 2020<br>[132]     | +   | +   | -                  | Hypertension, Mental disorders,<br>Diabetes, Ischaemic heart disease,<br>Stroke, COPD, Liver cirrhosis,<br>Dialysis, Traumatic brain injury,<br>Hyperlipidaemia | +           | -   | -         | +      | -                    | -/-                            | -                         |
| Choi, 2019<br>[137]    | +   | +   | +S/A               | Systolic blood pressure, Fasting serum<br>glucose, Total cholesterol<br>Charlson comorbidity index                                                              | -           | +   | -         | +      | +                    | -/-                            | -                         |
| Iwasaki<br>2019 [138]  | +   | +   | +S/A               | Hypertension, Depression, Diabetes,<br>Hearing loss                                                                                                             | -           | +   | +         | -      | +                    | -/-                            | -                         |
| Nilsson,<br>2018 [145] | +   | +   | +S                 | Ischaemic heart disease, Diabetes                                                                                                                               | -           |     | +         | -      | -                    | +/+                            | Living alone              |
| Chen, 2017<br>[133]    | +   | +   | -                  | Hypertension, Stroke, Depression,<br>Diabetes Hyperlipidaemia, kidney<br>disease, Traumatic brain injury                                                        | -           | -   | -         | -      | -                    | -/-                            | Urbanisation<br>level     |
| Lee, 2017<br>[134]     | +   | +   | -                  | Hypertension, Cardiovascular disease<br>Stroke, Diabetes, Chronic kidney<br>disease                                                                             | -           | -   | -         | -      | -                    | -/-                            | Urbanisation<br>level     |
| Lee, 2017<br>[134]     | +   | +   | -                  | Hypertension, Diabetes<br>Hyperlipidemia                                                                                                                        | -           | -   | -         | +      | -                    | -/-                            | Residential<br>urbanicity |
| Tzeng, 2016<br>[136]   | +   | +   | -                  | Hypertension, Stroke,<br>Hyperlipidaemia, Depression,<br>Traumatic brain injury, Diabetes<br>Chronic kidney disease                                             | -           | +   | -         | +      | -                    | -/-                            | Insured<br>premium        |

|                                |   |   |      |                                                                                               |   |   |   |   |   |     |                 |
|--------------------------------|---|---|------|-----------------------------------------------------------------------------------------------|---|---|---|---|---|-----|-----------------|
| Iwasaki, 2016 [139]            | + | + | +S/A | Hypertension, Stroke, Cardiovascular disease, Depression, Diabetes                            | - | + | + | - | + | -/- | -               |
| Naorungroj, 2015 [141]         | + | + | +S/A | Hypertension, Coronary heart disease, Diabetes, Stroke, Hyperlipidemia                        | - | + | + | + | - | -/- | APOE4           |
| Okamoto, 2015 [140]            | + | + | +S/A | Hypertension, Cerebrovascular disease, Myocardial infarction, Diabetes, Cancer, Dyslipidaemia | - | - | + | - | - | -/- | -               |
| Stewart, 2013 [142]            | + | + | +S   | Coronal heart disease, Cerebrovascular disease, Hypertension, Diabetes                        | + | + | + | + | - | -/- | CRP, IL6, APOE4 |
| Arrive, 2012 [144]             | + | + | +S/A | Hypertension, Angina, myocardial infarction, Stroke, Diabetes, Depression                     | - | + | + | - | - | -/- | Living alone    |
| Kaye et al., 2010 [143]        | + | - | +S/A | Hypertension, Cardiovascular disease, Stroke, Diabetes                                        | + | + | + | - | - | -/- | -               |
| <b>Cross-sectional studies</b> |   |   |      |                                                                                               |   |   |   |   |   |     |                 |
| Holmer, 2018 [131]             | + | + | +S   | Number of comorbidities                                                                       | + | + | + | + | - | +/+ | Marital status  |
| <b>Case-control studies</b>    |   |   |      |                                                                                               |   |   |   |   |   |     |                 |
| Stein, 2007 [146]              | + | + | -    | -                                                                                             | - | - | + | - | - | -/- | -               |
| Gil-Montoya, 2015 [147]        | + | + | +S/A | Hyperlipidaemia, Hyperglycaemia                                                               | - | - | + | - | - | +/- | -               |
